# Supplementary material
Source: PubMed Central journal article supplement (PMC4291437)
Supplement: AAC.04224-14_zac001153601so1.pdf [file AAC.04224-14_zac001153601so1.pdf]

**TABLE S1**

Table of *Klebsiella pneumoniae* isolates sequenced in this study and selected characteristics.

| <b>PUBLICATION_NAME</b> | <b>ENTRY</b> | <b>YEAR OF COLLECTION</b> | <b>MLST</b> | <b>HOSPITAL</b>      | <b>PHENOTYPE</b> |
|-------------------------|--------------|---------------------------|-------------|----------------------|------------------|
| 100SGR                  | ERS480596    | 2012                      | 16          | SAN GIOVANNI ROTONDO | ESBL             |
| 101BO                   | ERS480597    | 2012                      | 512         | BOLOGNA              | KPC              |
| 102BO                   | ERS480598    | 2012                      | 512         | BOLOGNA              | KPC              |
| 103BO                   | ERS480599    | 2012                      | 512         | BOLOGNA              | KPC              |
| 104BO                   | ERS480600    | 2012                      | 512         | BOLOGNA              | KPC              |
| 10PV                    | ERS480601    | 2012                      | 307         | PAVIA                | ESBL             |
| 11PV                    | ERS480602    | 2013                      | 258         | PAVIA                | KPC              |
| 12PV                    | ERS480603    | 2013                      | 258         | PAVIA                | KPC              |
| 13PV                    | ERS480604    | 2013                      | 258         | PAVIA                | KPC              |
| 14PV                    | ERS480605    | 2012                      | 1624        | PAVIA                | Susceptible      |
| 15PV                    | ERS480606    | 2012                      | 976         | PAVIA                | Susceptible      |
| 16BO                    | ERS480607    | 2011                      | 37          | BOLOGNA              | ESBL             |
| 17PV                    | ERS480608    | 2012                      | 307         | PAVIA                | ESBL             |
| 18PV                    | ERS480609    | 2013                      | 15          | PAVIA                | ESBL             |
| 19PV                    | ERS480610    | 2013                      | 15          | PAVIA                | ESBL             |
| 20PV                    | ERS480611    | 2012                      | 1631        | PAVIA                | Susceptible      |
| 21PV                    | ERS480612    | 2012                      | 240         | PAVIA                | Susceptible      |
| 22PV                    | ERS480613    | 2012                      | 1625        | PAVIA                | Susceptible      |
| 23PV                    | ERS480614    | 2013                      | 258         | PAVIA                | KPC              |
| 24PV                    | ERS480615    | 2013                      | 258         | PAVIA                | KPC              |
| 25BO                    | ERS480616    | 2013                      | 35          | BOLOGNA              | Susceptible      |
| 26BO                    | ERS480617    | 2013                      | 35          | BOLOGNA              | Susceptible      |
| 27BO                    | ERS480618    | 2011                      | 45          | BOLOGNA              | ESBL             |
| 28BO                    | ERS480619    | 2011                      | 37          | BOLOGNA              | ESBL             |
| 29BO                    | ERS480620    | 2012                      | 512         | BOLOGNA              | KPC              |
| 30BO                    | ERS480621    | 2012                      | 512         | BOLOGNA              | KPC              |
| 31AVR                   | ERS480622    | 2013                      | 512         | CESENA               | KPC              |
| 32AVR                   | ERS480623    | 2013                      | 466         | CESENA               | Susceptible      |
| 34AVR                   | ERS480624    | 2013                      | 405         | CESENA               | Susceptible      |
| 36AVR                   | ERS480625    | 2013                      | 37          | CESENA               | Susceptible      |
| 37AVR                   | ERS480626    | 2013                      | 323         | CESENA               | ESBL             |
| 39AVR                   | ERS480627    | 2013                      | 395         | CESENA               | Susceptible      |
| 40AVR                   | ERS480628    | 2013                      | 307         | CESENA               | ESBL             |
| 41AVR                   | ERS480629    | 2013                      | 16          | CESENA               | ESBL             |
| 42AVR                   | ERS480630    | 2013                      | 512         | CESENA               | KPC              |
| 43AVR                   | ERS480631    | 2013                      | 512         | CESENA               | KPC              |
| 44AVR                   | ERS480632    | 2013                      | 512         | CESENA               | KPC              |
| 45AVR                   | ERS480633    | 2013                      | 160         | CESENA               | Susceptible      |
| 46AVR                   | ERS480634    | 2013                      | 395         | CESENA               | ESBL             |
| 47AVR                   | ERS480635    | 2013                      | 323         | CESENA               | ESBL             |
| 48AVR                   | ERS480636    | 2013                      | 512         | CESENA               | KPC              |
| 49BG                    | ERS480637    | 2012                      | 147         | BERGAMO              | Susceptible      |
| 50BG                    | ERS480638    | 2011                      | 258         | BERGAMO              | KPC              |
| 51BG                    | ERS480639    | 2007                      | 1626        | BERGAMO              | Susceptible      |
| 52BG                    | ERS480640    | 2006                      | 268         | BERGAMO              | Susceptible      |
| 53BG                    | ERS480641    | 2009                      | 321         | BERGAMO              | Susceptible      |
| 54BG                    | ERS480642    | 2011                      | 258         | BERGAMO              | KPC              |
| 55BG                    | ERS480643    | 2012                      | 466         | BERGAMO              | Susceptible      |
| 56BG                    | ERS480644    | 2011                      | 258         | BERGAMO              | KPC              |

| PUBLICATION_NAME | ENTRY     | YEAR OF COLLECTION | MLST | HOSPITAL             | PHENOTYPE   |
|------------------|-----------|--------------------|------|----------------------|-------------|
| 57BG             | ERS480645 | 2011               | 258  | BERGAMO              | KPC         |
| 58BG             | ERS480646 | 2011               | 512  | BERGAMO              | KPC         |
| 60BG             | ERS480647 | 2012               | 45   | BERGAMO              | ESBL        |
| 62BG             | ERS480648 | 2011               | 147  | BERGAMO              | ESBL        |
| 63BG             | ERS480649 | 2011               | 1627 | BERGAMO              | ESBL        |
| 65BO             | ERS480650 | 2013               | 1243 | BOLOGNA              | Susceptible |
| 66BO             | ERS480651 | 2013               | 416  | BOLOGNA              | Susceptible |
| 67BO             | ERS480652 | 2013               | 1628 | BOLOGNA              | Susceptible |
| 68BO             | ERS480653 | 2011               | 37   | BOLOGNA              | ESBL        |
| 69BO             | ERS480654 | 2011               | 277  | BOLOGNA              | ESBL        |
| 70BO             | ERS480655 | 2011               | 37   | BOLOGNA              | ESBL        |
| 71RE             | ERS480656 | 2011               | 258  | REGGIO EMILIA        | KPC         |
| 72RE             | ERS480657 | 2011               | 258  | REGGIO EMILIA        | KPC         |
| 73RE             | ERS480658 | 2011               | 258  | REGGIO EMILIA        | KPC         |
| 74RE             | ERS480659 | 2011               | 512  | REGGIO EMILIA        | KPC         |
| 75RE             | ERS480660 | 2011               | 258  | REGGIO EMILIA        | KPC         |
| 76RE             | ERS480661 | 2012               | 1243 | REGGIO EMILIA        | Susceptible |
| 77RE             | ERS480662 | 2012               | 1629 | REGGIO EMILIA        | Susceptible |
| 78RE             | ERS480663 | 2012               | 1164 | REGGIO EMILIA        | Susceptible |
| 79RE             | ERS480664 | 2012               | 35   | REGGIO EMILIA        | Susceptible |
| 81RE             | ERS480665 | 2011               | 147  | REGGIO EMILIA        | ESBL        |
| 82RE             | ERS480666 | 2012               | 405  | REGGIO EMILIA        | ESBL        |
| 83RE             | ERS480667 | 2012               | 147  | REGGIO EMILIA        | ESBL        |
| 84RE             | ERS480668 | 2012               | 322  | REGGIO EMILIA        | ESBL        |
| 85RE             | ERS480669 | 2012               | 37   | REGGIO EMILIA        | ESBL        |
| 86SGR            | ERS480670 | 2011               | 512  | SAN GIOVANNI ROTONDO | KPC         |
| 87SGR            | ERS480671 | 2011               | 512  | SAN GIOVANNI ROTONDO | KPC         |
| 88SGR            | ERS480672 | 2011               | 512  | SAN GIOVANNI ROTONDO | KPC         |
| 89SGR            | ERS480673 | 2011               | 512  | SAN GIOVANNI ROTONDO | KPC         |
| 90SGR            | ERS480674 | 2011               | 512  | SAN GIOVANNI ROTONDO | KPC         |
| 91SGR            | ERS480675 | 2012               | 29   | SAN GIOVANNI ROTONDO | Susceptible |
| 92SGR            | ERS480676 | 2012               | 70   | SAN GIOVANNI ROTONDO | Susceptible |
| 93SGR            | ERS480677 | 2012               | 35   | SAN GIOVANNI ROTONDO | Susceptible |
| 94SGR            | ERS480678 | 2012               | 45   | SAN GIOVANNI ROTONDO | Susceptible |
| 95SGR            | ERS480679 | 2012               | 1307 | SAN GIOVANNI ROTONDO | Susceptible |
| 96SGR            | ERS480680 | 2012               | 1630 | SAN GIOVANNI ROTONDO | ESBL        |
| 97SGR            | ERS480681 | 2012               | 512  | CESENA               | ESBL        |
| 98SGR            | ERS480682 | 2012               | 20   | SAN GIOVANNI ROTONDO | ESBL        |
| 99SGR            | ERS480683 | 2012               | 15   | SAN GIOVANNI ROTONDO | ESBL        |
| 9PV              | ERS480684 | 2012               | 307  | PAVIA                | ESBL        |

**TABLE S2**

Genes with potential effect on virulence or antibiotic resistance phenotype comprised in recombined region of ~1.3 Mb described in this work. Coordinates and strand are referred to the genome of the reference strain NJST258\_1, annotation was obtained by BLAST search against a specifically designed database, as reported in the materials and methods section.

| START   | END     | STRAND | PRODUCT NAME                                                                         |
|---------|---------|--------|--------------------------------------------------------------------------------------|
| 18482   | 20224   | +      | Integral membrane protein with trka domains                                          |
| 29471   | 30706   | -      | Multidrug resistance protein emrD                                                    |
| 69212   | 72319   | -      | multidrug transporter                                                                |
| 72319   | 73443   | -      | acriflavine resistance protein E                                                     |
| 138949  | 140223  | -      | 3-deoxy-D-manno-octulosonic acid transferase WaaA                                    |
| 142431  | 143558  | -      | glycosyl transferase family 1 WabG                                                   |
| 143555  | 144631  | -      | glycosyl transferase family 9 WaaQ                                                   |
| 148902  | 149873  | -      | ADP-heptose-LPS heptosyltransferase WaaC                                             |
| 149877  | 150935  | -      | ADP-heptose-LPS heptosyltransferase WaaF                                             |
| 150945  | 151877  | -      | ADP-L-glycero-D-manno-heptose-6-epimerase RfaD                                       |
| 188732  | 190165  | +      | Xylose isomerase                                                                     |
| 291995  | 293161  | +      | UDP-4-amino-L-arabinose synthase PmrH                                                |
| 293109  | 294146  | +      | Undecaprenyl-phosphate alpha-4-amino-L-arabinosyltransferase ArnC                    |
| 294143  | 296128  | +      | UDP-4-amino-4-deoxy-L-arabinose formyltransferase AmA                                |
| 296125  | 297027  | +      | 4-deoxy-4-formamido-L-arabinose-phospho-UDP deformylase PmrJ                         |
| 297024  | 298682  | +      | Undecaprenyl phosphate-alpha-4-amino-4-deoxy-L-arabinose arabinosyl transferase ArnT |
| 298679  | 299017  | +      | 4-amino-4-deoxy-L-arabinose-phospho-UDP flippase PmrL                                |
| 299017  | 299397  | +      | 4-amino-4-deoxy-L-arabinose-phospho-UDP flippase PmrM                                |
| 373562  | 374329  | +      | Transcriptional regulatory protein ompR                                              |
| 374326  | 375681  | +      | osmolarity sensor protein envZ                                                       |
| 408428  | 409060  | -      | Crp/Fnr family transcriptional regulator                                             |
| 424107  | 425291  | +      | Elongation factor Tu                                                                 |
| 457426  | 460536  | -      | multidrug transporter AcrB                                                           |
| 460549  | 461688  | -      | acrE                                                                                 |
| 462055  | 462717  | +      | AcrAB operon repressor                                                               |
| 532636  | 532923  | -      | yhbH                                                                                 |
| 536245  | 536811  | -      | yrbI                                                                                 |
| 540606  | 541172  | +      | yrbD/mlad                                                                            |
| 541191  | 541826  | +      | mlac                                                                                 |
| 553941  | 554792  | +      | dihydropteroate synthase                                                             |
| 4632900 | 4634141 | +      | multidrug transporter                                                                |
| 4638808 | 4639326 | -      | Transcriptional regulator, MarR family protein                                       |
| 4646942 | 4648030 | -      | ABC-type_sugar_transport_system,_periplasmic_component                               |
| 4682645 | 4683964 | -      | xylose isomerase                                                                     |
| 4684337 | 4685830 | +      | Xyloside transporter                                                                 |
| 4685889 | 4687568 | +      | beta-xylosidase                                                                      |
| 4845809 | 4846771 | +      | Phosphatidylserine_decarboxylase psd                                                 |
| 4853100 | 4854890 | +      | fumarate reductase frdA                                                              |
| 4854835 | 4855617 | +      | frdB                                                                                 |
| 4855628 | 4856023 | +      | fumarate reductase frdC                                                              |
| 4856004 | 4856393 | +      | frdD                                                                                 |
| 4856507 | 4857040 | +      | Bacterial_lipocalin                                                                  |
| 4857037 | 4857354 | -      | Membrane_transporter_of_cations_and_cationic_drugs sugE                              |
| 4874086 | 4875387 | +      | C4-dicarboxylate ABC transporter DcuA                                                |
| 4901698 | 4904016 | -      | Ferrienterobactin receptor precursor fepA                                            |
| 4996917 | 5000978 | -      | rpoB                                                                                 |
| 5005173 | 5006357 | -      | elongation factor Tu                                                                 |
| 5149976 | 5150674 | +      | cpxR                                                                                 |
| 5150671 | 5152044 | +      | Sensor protein cpxA                                                                  |
| 5160685 | 5161671 | +      | ABC-type_sugar_transport_system,_periplasmic_component rhaS                          |
| 5256865 | 5258115 | -      | Chloramphenicol resistance protein                                                   |

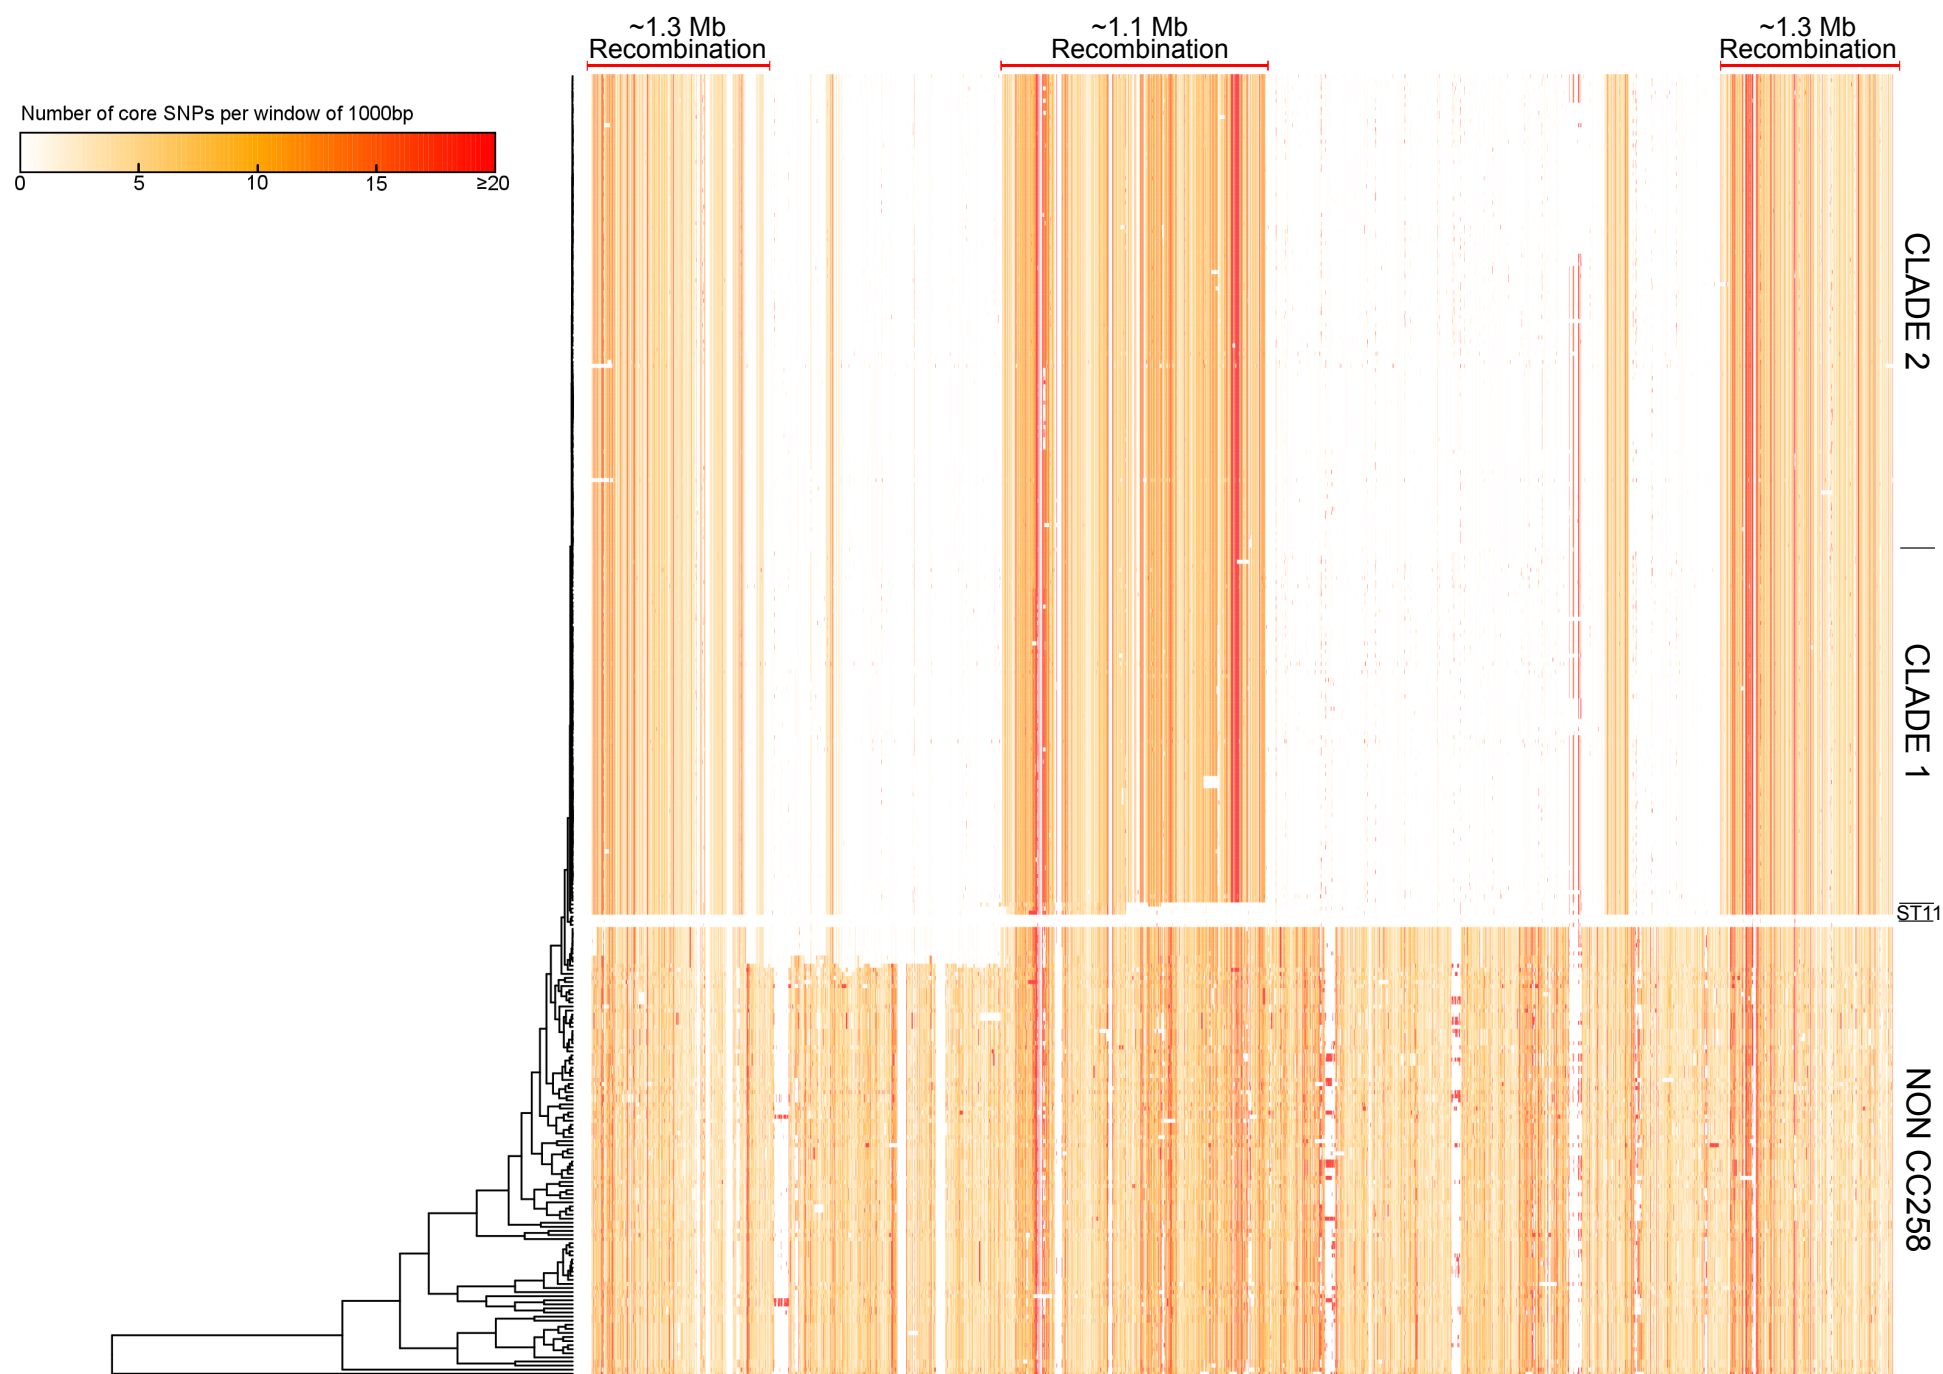

**FIGURE S1**

Clustering of core SNPs in the 319 *Klebsiella pneumoniae* genomes. The phylogenetic reconstruction is shown on the left, while the core SNP frequency is shown on the right, in shades of red representing number of core SNPs per 1000bp windows for each genome. Detected recombinations are indicated on the top of the figure, main clades detected in the phylogenetic analysis are indicated on the right side of the figure.

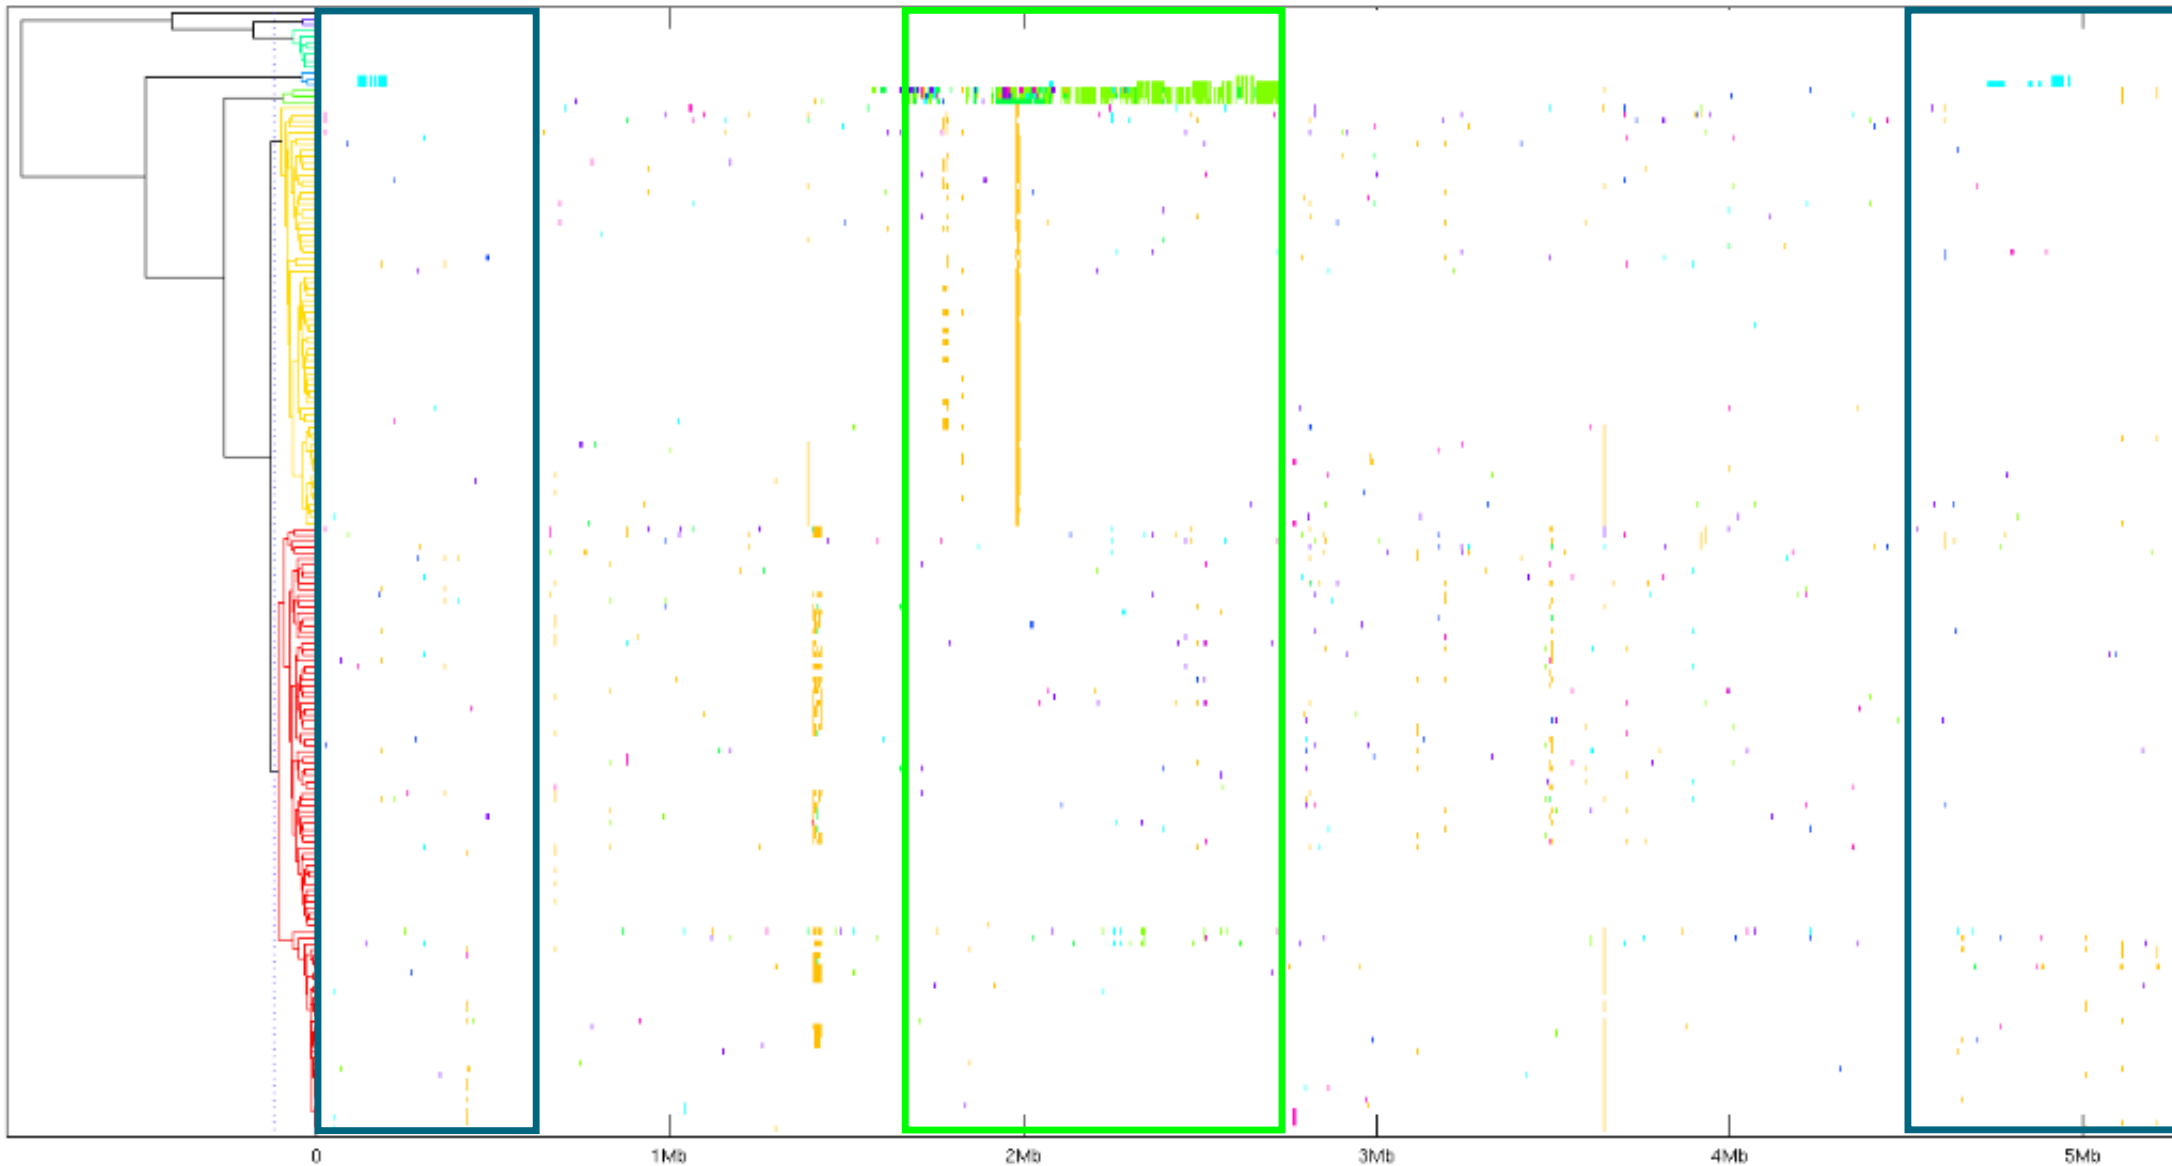

## FIGURE S2

Recombination analysis obtained with BRATnextgen. A subset of 187 genomes was used as input for a 100 iteration analysis with 100 replicates with the BRATnextgen software. The recombination proposed by Chen and coworkers is detected in green while the recombination proposed in this work is detected in blue. Recombined regions as detected with the SNP-based method are indicated with boxes, using the same colors as those chosen by the BRATnextgen software.

**FIGURE S3**

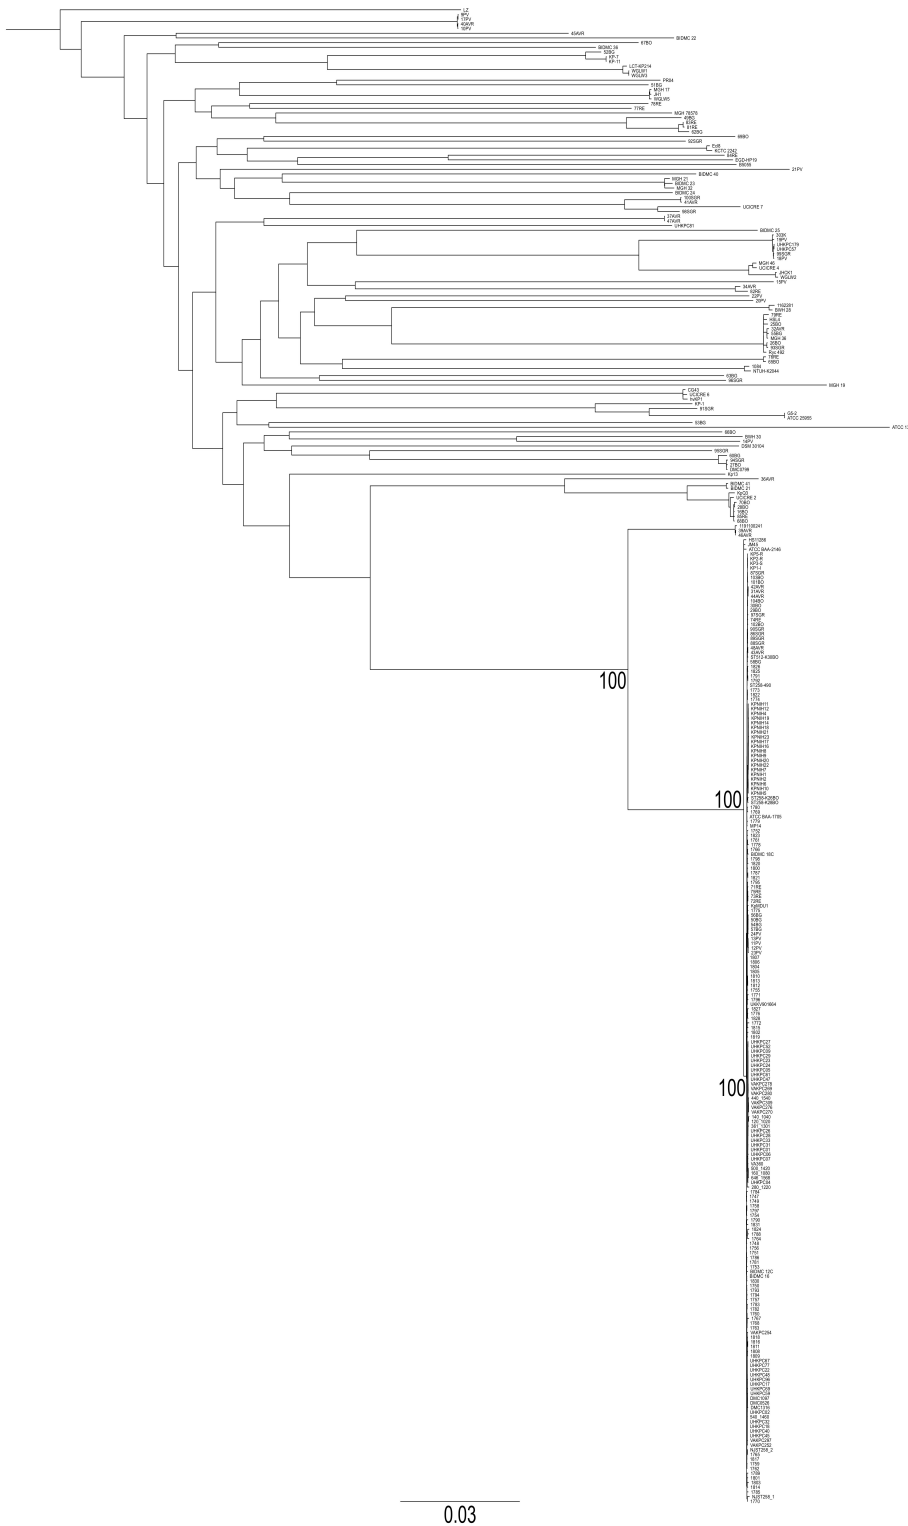

**FIGURE S3.** Phylogeny of the 319 *Klebsiella pneumoniae* genomes based on core SNPs in non-recombined regions. Phylogeny was reconstructed starting from an alignment of 55,368 core SNPs, located outside of the two main recombined regions of the genome, using the software RAXML, with the Generalised time-reversible (GTR) model and 100 bootstrap replicates. Bootstrap is shown only for the three main nodes of Clonal Complex 258.

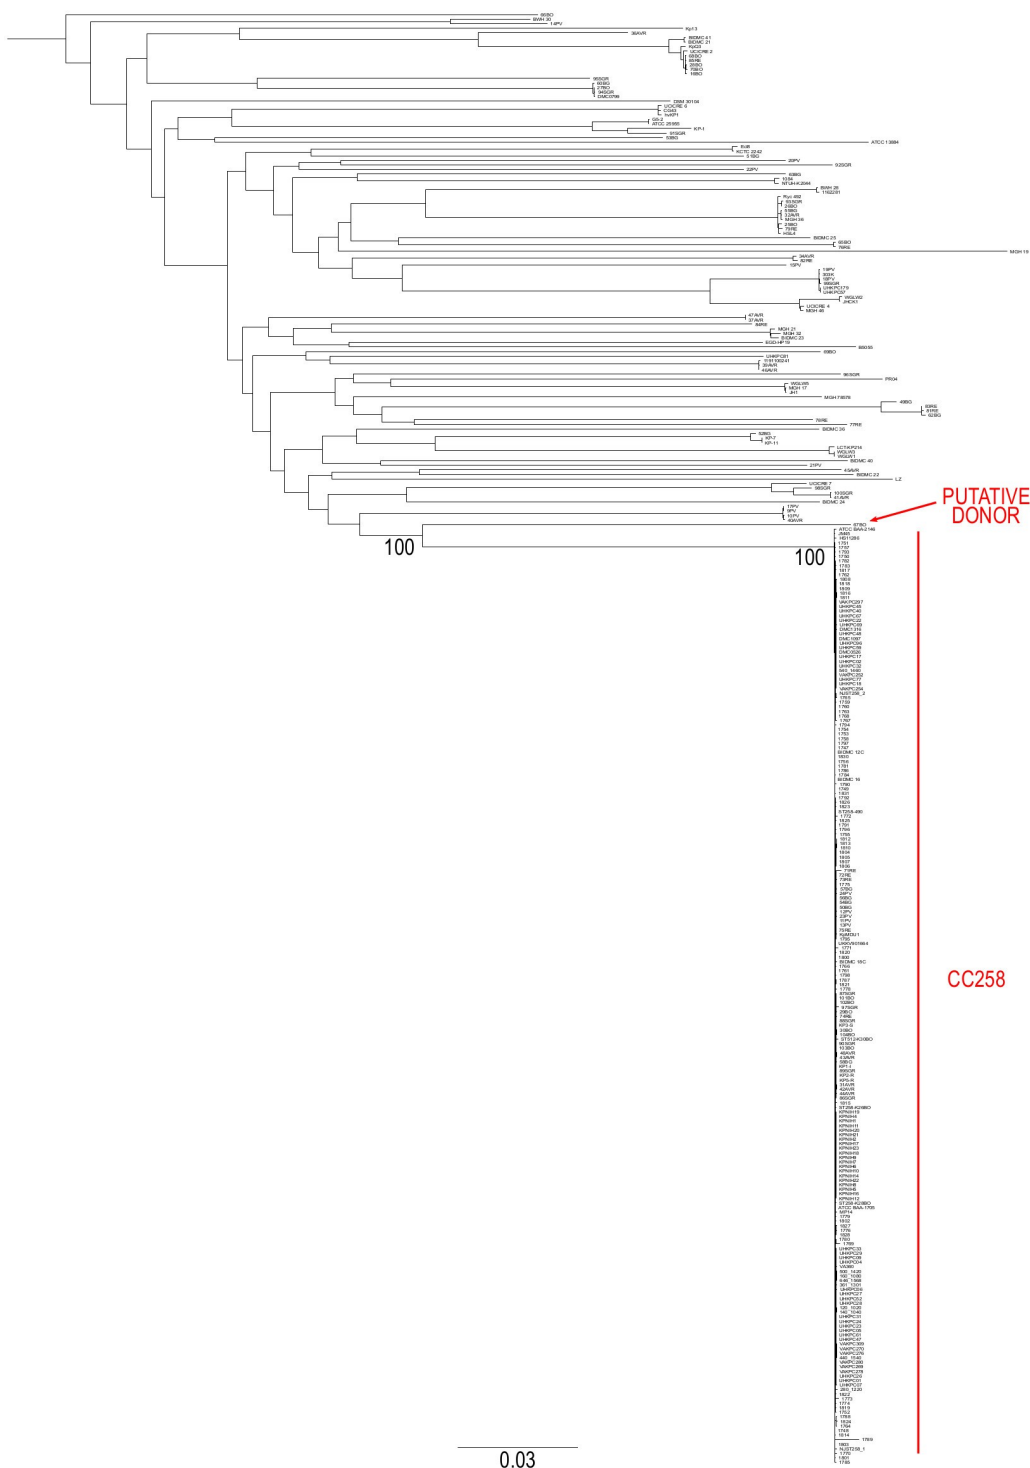

**FIGURE S4**

phylogeny of the 319 *Klebsiella pneumoniae* genomes based on core SNPs in the ~1.3Mb recombined region. Phylogeny was reconstructed starting from an alignment of 24,537 core SNPs present only in the recombined region located from 4,554,906 to 629,621, spanning the origin of replication, using coordinates of genome NJST258\_1. The tree was obtained using the software RAxML, with the Generalised time-reversible (GTR) model and 100 bootstrap replicates, bootstraps are shown only for nodes of interest. The putative donor of the ~1.3Mb recombined region, 67BO, results as sister clade of the recipient CC258.

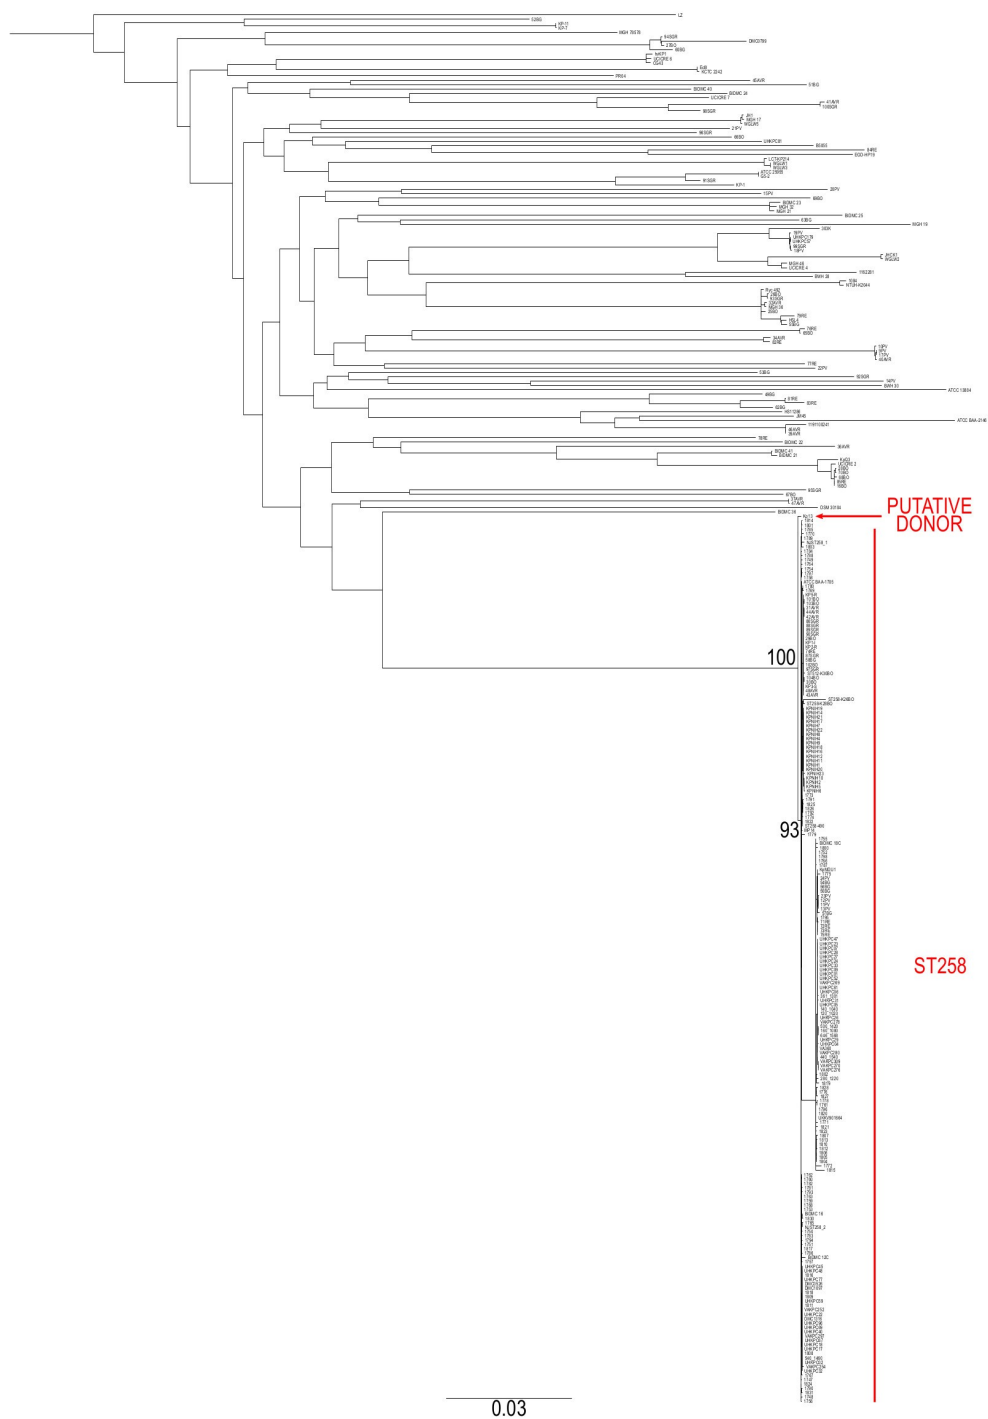

**FIGURE S5.** phylogeny of the 319 *Klebsiella pneumoniae* genomes based on core SNPs in the ~1.1Mb recombined region. Phylogeny was reconstructed starting from an alignment of 14,905 core SNPs present only in the recombined region located from 1,675,550 to 2,740,033, using coordinates of genome NJST258\_1. The tree was obtained using the software RAxML, with the Generalised time-reversible (GTR) model and 100 bootstrap replicates, bootstraps are shown only for nodes of interest. The putative donor of the ~1.1Mb recombined region, Kp13, results as sister clade of the recipient CC258 clade, with the exclusion of the ST11 clade.
